# Supplementary material for: Coronavirus-like Core–Shell-Structured Co@C for Hydrogen Evolution via Hydrolysis of Sodium Borohydride
Source: MDPI journal article supplement (doi:10.3390/molecules28031440), 2023-02-02
Supplement: s1 [file s1]

## Supporting information

### **Coronavirus-like core-shell structured Co@C for hydrogen evolution via hydrolysis of sodium borohydride**

Shuyi Su <sup>1</sup>, Kailei Chen <sup>1,2</sup>, Xu Yang <sup>1,2\*</sup>, Dai Dang <sup>1,2\*</sup>

<sup>1</sup> School of Chemical Engineering and Light Industry, Guangdong University of Technology, Guangzhou, 510006, P. R. China;

<sup>2</sup> Jieyang Branch of Chemistry and Chemical Engineering, Guangdong Laboratory (Rongjiang Laboratory), Jieyang 515200, China;

\* Correspondence: yangxu@gdut.edu.cn;

## 1. Figures

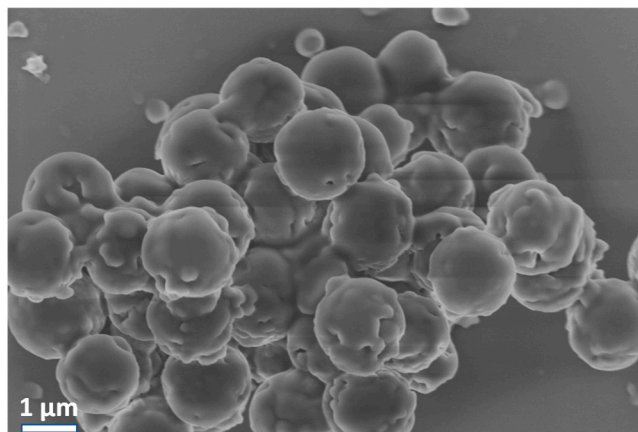

**Figure S1** SEM image of Co@C-750. The nano-bumps disappear when the carbonization temperature rises to 750 °C, suggesting an optimized temperature needed for nano-bumps' growth.

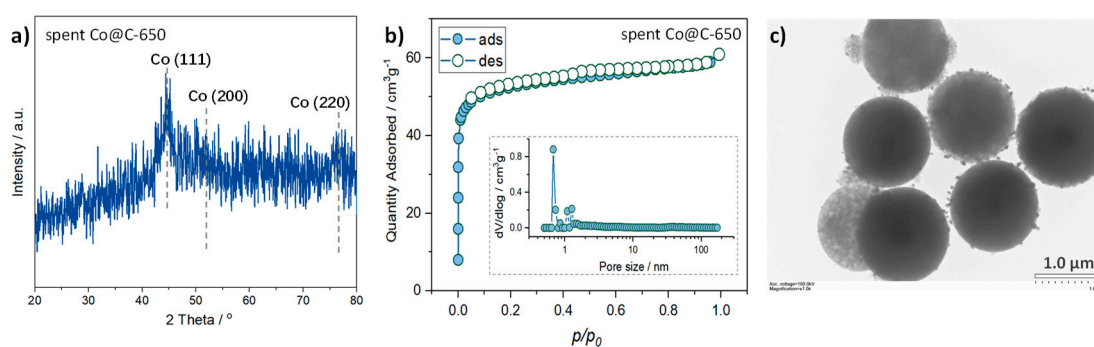

**Figure S2** (a) XRD pattern and (b) nitrogen sorption with corresponding pore size distribution (inset), and (c) TEM image of the spent Co@C-650.
